# Supplementary material for: Gold nanohexagrams via active surface growth under sole CTAB control
Source: Royal Society of Chemistry journal article supplement (doi:10.1039/d3nr03006g), 2023-01-01
Supplement: d3nr03006g1.pdf [file d3nr03006g1.pdf]

# Gold Nanohexagrams via Active Surface Growth Under Sole CTAB Control

An Su,<sup>a,b</sup> Qian Wang,<sup>a,b</sup> Liping Huang,<sup>a,b</sup> Yonglong Zheng,<sup>a,b,c</sup> Yawen Wang,<sup>c</sup> and Hongyu Chen<sup>\*a,b</sup>

<sup>a</sup>Department of Chemistry, School of Science and Research Center for Industries of the Future, Westlake University, 600 Dunyu Road, Hangzhou 310030, Zhejiang Province, China.

<sup>b</sup>Institute of Natural Sciences, Westlake Institute for Advanced Study, 18 Shilongshan Road, Hangzhou 310024, Zhejiang Province, China.

<sup>c</sup>Institute of Advanced Synthesis (IAS), and School of Chemistry and Molecular Engineering, Jiangsu National Synergetic Innovation Centre for Advanced Materials, Nanjing Tech University, Nanjing, 211816, China.

## Supplementary Figures :

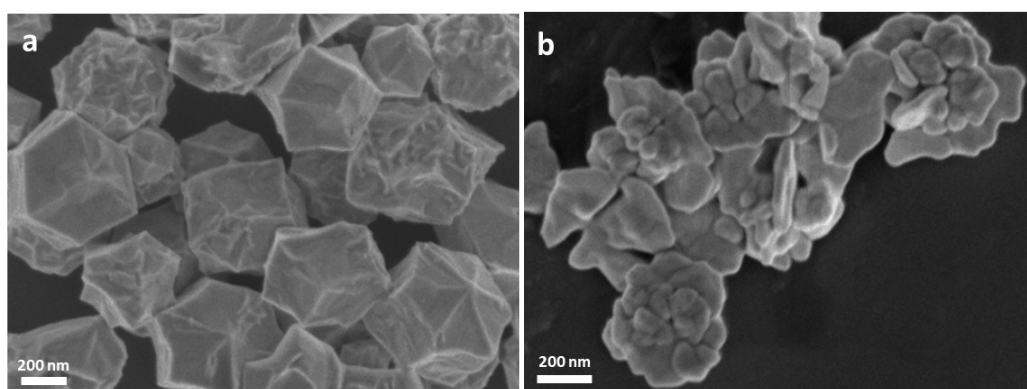

**Figure S1.** CTAB replaced with (a) CTAC and (b) NaBr of the same molar concentration.

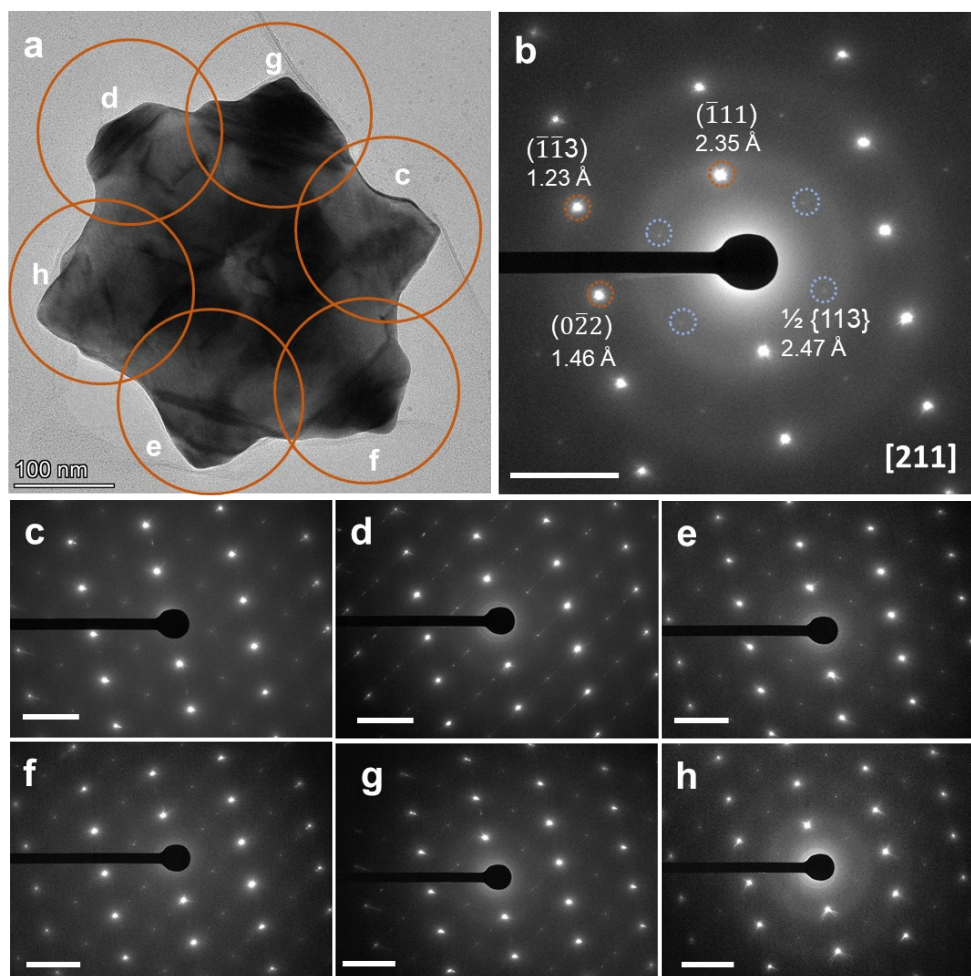

**Figure S2.** The pseudo-single-crystallinity of the nano-hexagram. a) TEM image of a typical nano-hexagram, showing the selected areas of the SAED analyses. b) SAED pattern of the entire nano-hexagram aligned to the  $[211]$  zone axis, the d-spacing with  $2.35 \text{ \AA}$ ,  $1.23 \text{ \AA}$ ,  $1.46 \text{ \AA}$ ,  $2.47 \text{ \AA}$  correspond to  $\{111\}$ ,  $\{113\}$ ,  $\{022\}$  and  $1/2\{113\}$  respectively. c-h) SAED pattern of each corner. Scale bar:  $5 \text{ nm}^{-1}$ .

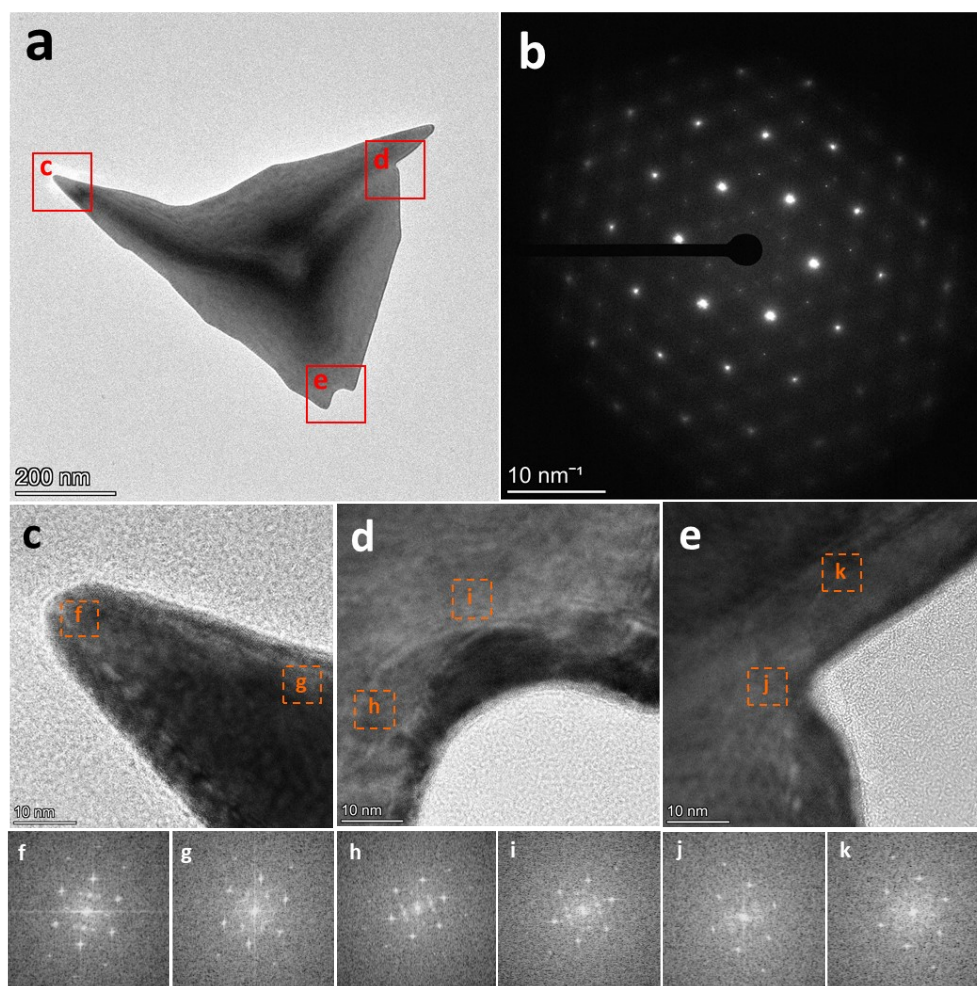

**Figure S3.** The pseudo-single-crystallinity of the nano-hexagram with curved tips. a) TEM image of a typical nano-hexagram. b) SAED pattern of the entire nano-hexagram. c-e) the selected areas of the curved regions and tips in (a). f-k) Fourier transformation patterns of the selected areas in (c-e).

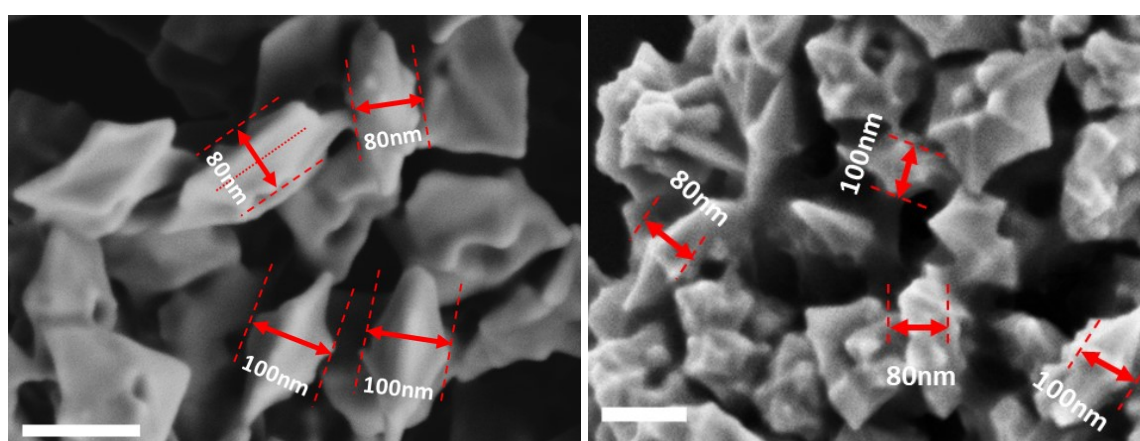

**Figure S4.** Representative samples indicating the thickness of nano-hexagram are 80-100 nm (scale bar 200 nm).

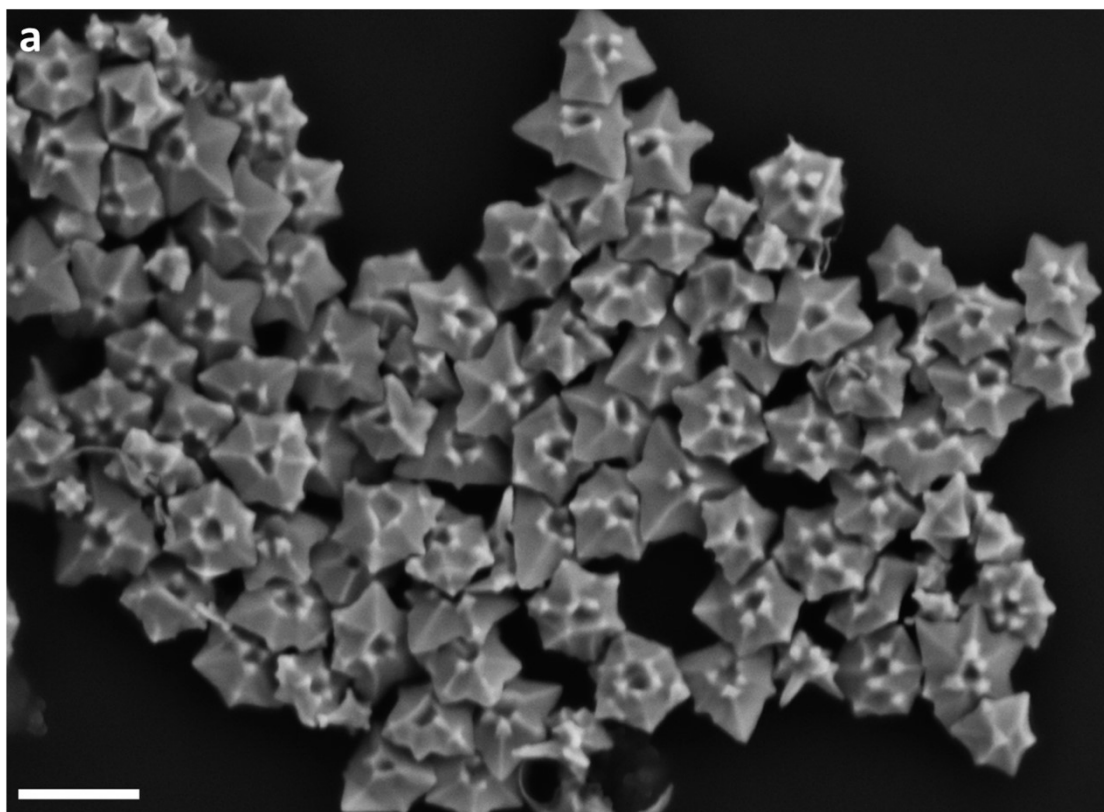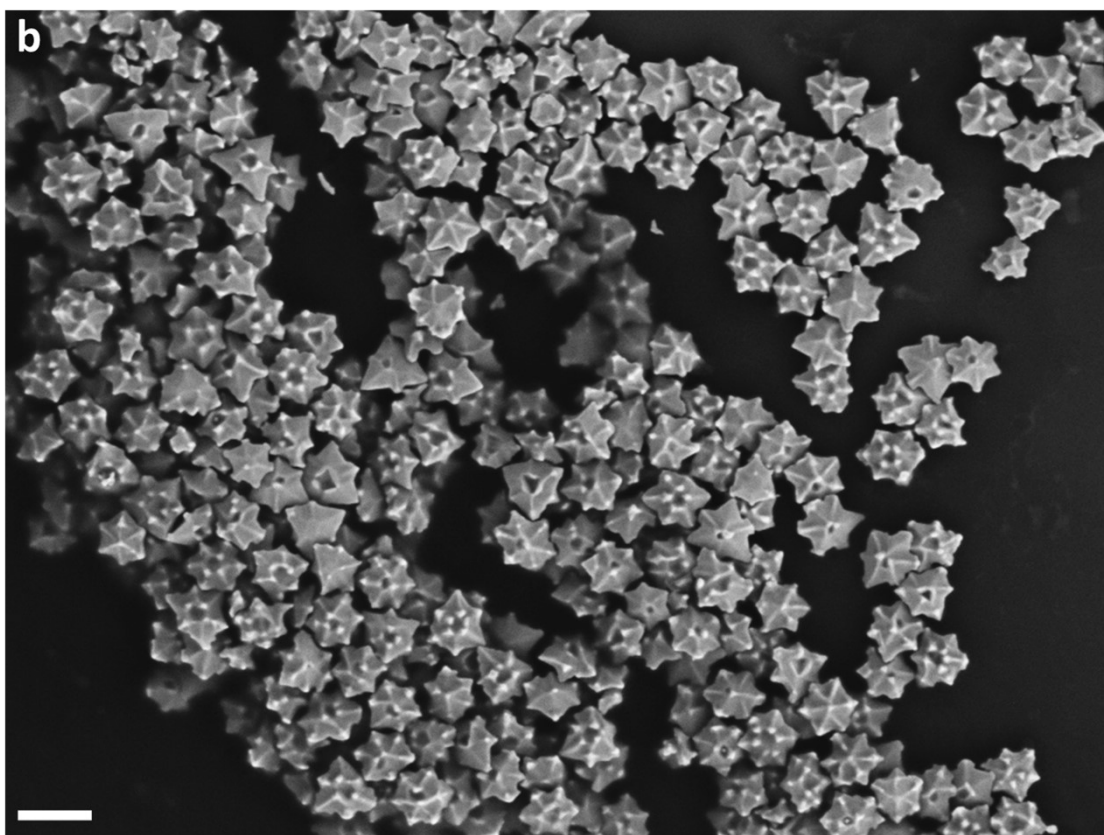

**Figure S5.** Large-view image of gold nanostructures for a) Figure 4g. b) Figure 4f. All scale bars are 400 nm.

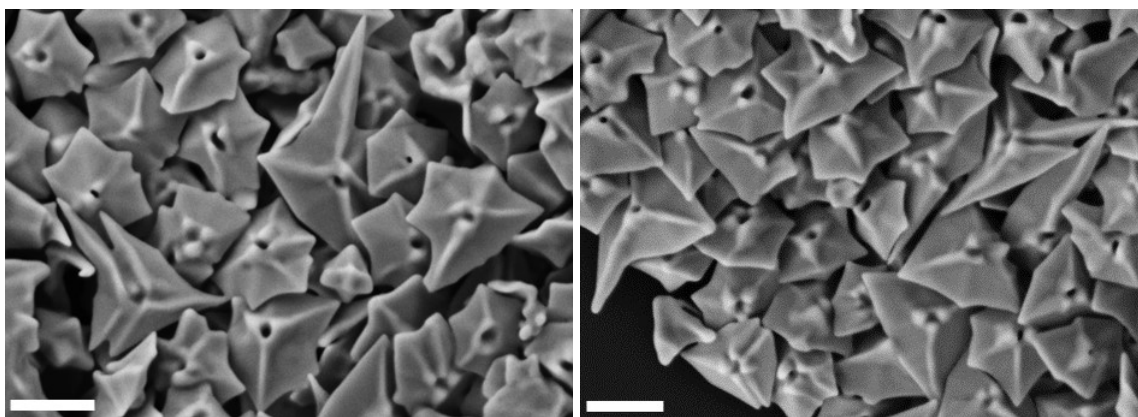

**Figure S6.** Large-view images of gold nanohexagram with curved tips and steep ridges for Figure 4j. All scale bars are 400 nm.

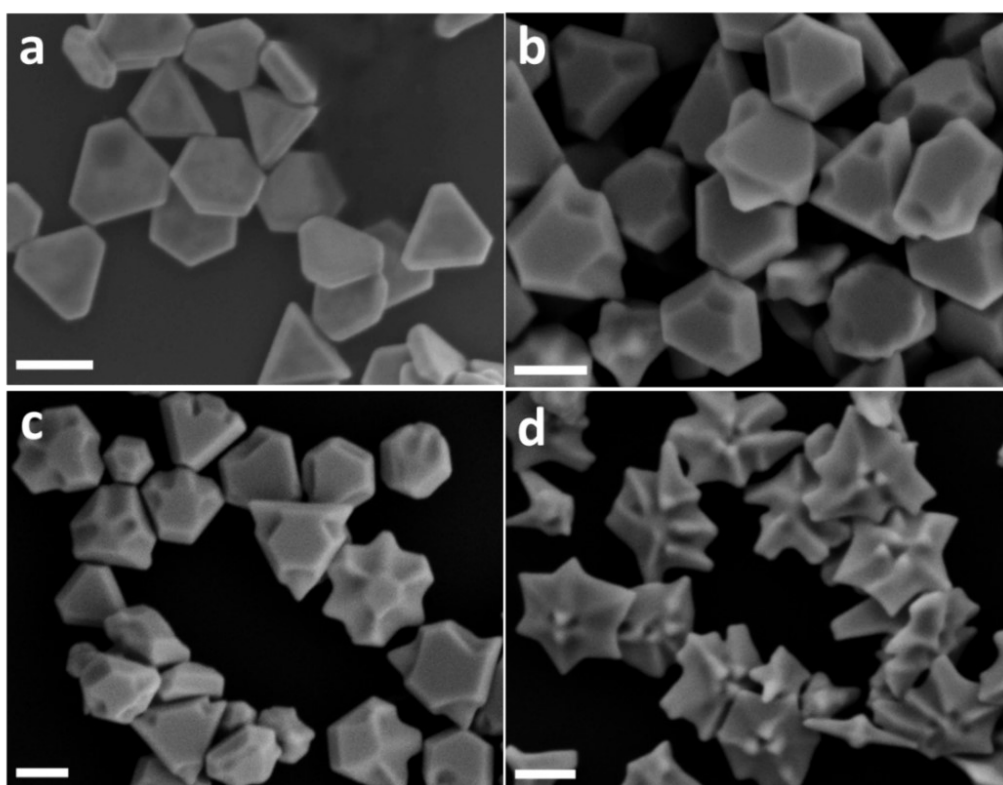

**Figure S7.** Dependence of the growth mode on the rate of reduction. a) the products obtained with the AA/HAuCl<sub>4</sub> ratio of 3. (b-d) the product nanostructures obtained with increasing amount of NaOH (0.25, 0.5, and 0.75 equivalent of AA), with the AA/HAuCl<sub>4</sub> ratio kept at 3. All scale bars are 400 nm.

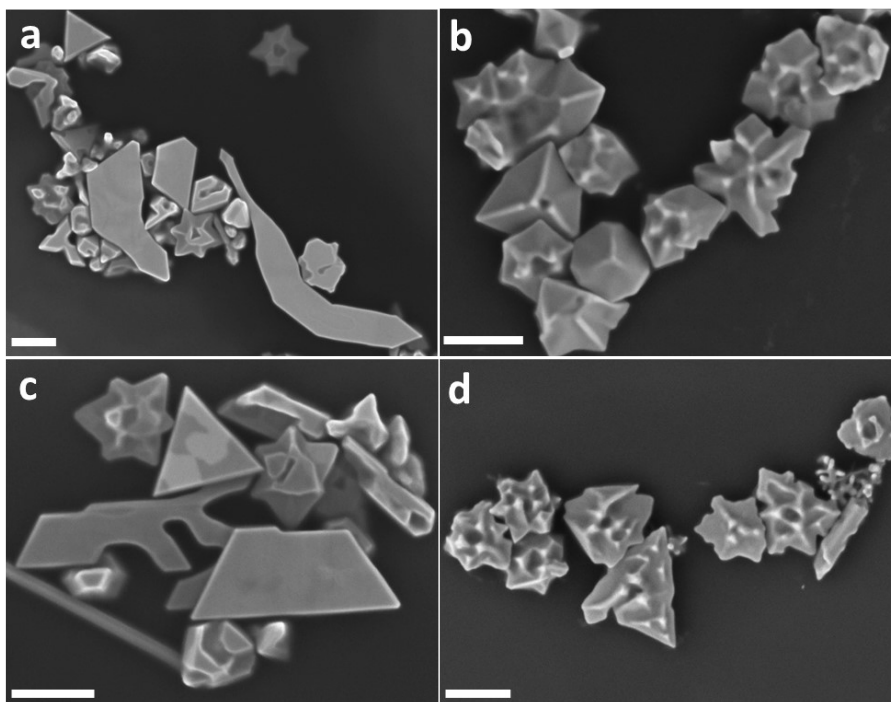

**Figure S8.** Dependence of the growth mode on CTAB concentration and the rate of reduction. a) 5 mM CTAB, AA/HAuCl<sub>4</sub> ratio at 3. b) 5 mM CTAB, AA/HAuCl<sub>4</sub> ratio at 12. c) 1 Mm CTAB, AA/HAuCl<sub>4</sub> ratio at 3. d) 1 mM CTAB, AA/HAuCl<sub>4</sub> ratio at 12. All scale bars are 200 nm.

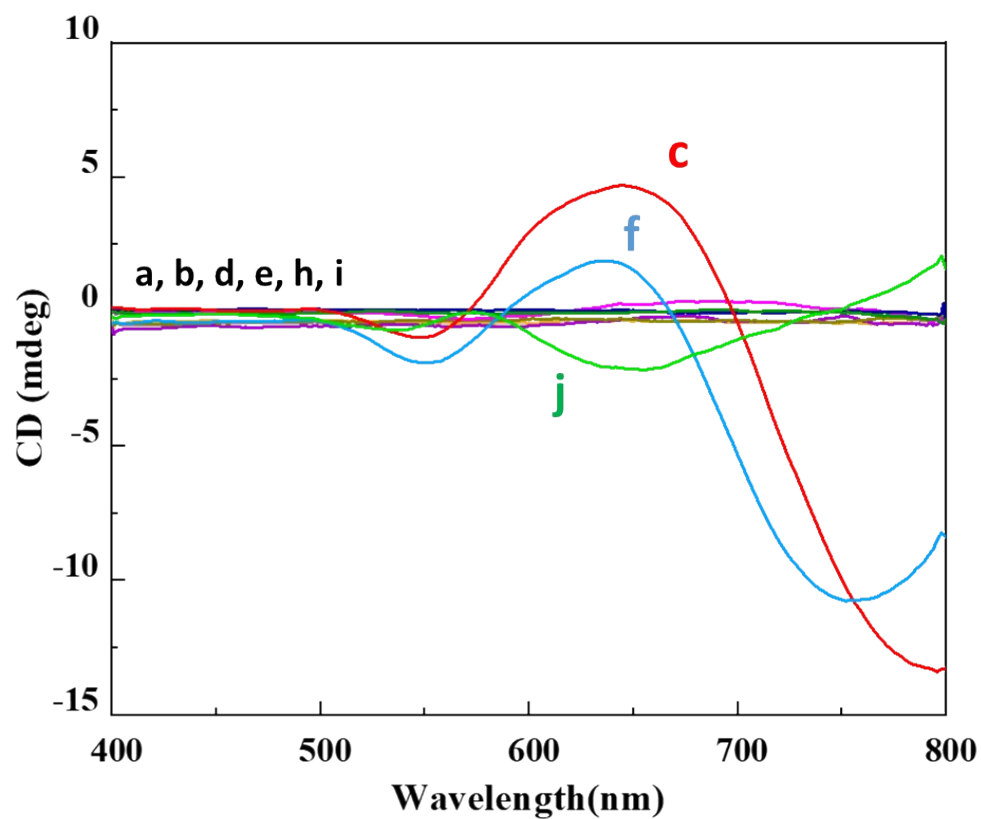

**Figure S9.** The CD spectra for samples in Figure 5.
